# Supplementary material for: Repeated Cocaine Intake Differentially Impacts Striatal D2/3 Receptor Availability, Psychostimulant-Induced Dopamine Release, and Trait Behavioral Markers of Drug Abuse
Source: MDPI journal article supplement (doi:10.3390/ijms241713238), 2023-08-26
Supplement: s1 [file s1]

**Table S1:** In Vivo Binding of [<sup>123</sup>I]IBZM in the dorsal (DST) and ventral (VST) striatum of RHA and RLA rats at baseline.

|                  | RHA<br>(n=18)                          | RLA<br>(n=18)                       |
|------------------|----------------------------------------|-------------------------------------|
| <b>DST</b>       |                                        |                                     |
| BP <sub>ND</sub> | 1.84 ± 0.41***<br>(%SE = 2.23 ± 0.67)  | 2.86 ± 0.38<br>(%SE = 3.14 ± 1.34)  |
| Gamma            | 0.036 ± 0.008***<br>(%SE = 22.0 ± 5.8) | 0.016 ± 0.004<br>(%SE = 25.1 ± 4.0) |
| <b>VST</b>       |                                        |                                     |
| BP <sub>ND</sub> | 1.16 ± 0.29***<br>(%SE = 2.52 ± 0.74)  | 1.706 ± 0.25<br>(%SE = 3.51 ± 1.52) |
| Gamma            | 0.013 ± 0.011<br>(%SE > 100 ± 100)     | 0.008 ± 0.008<br>(%SE > 100 ± 100)  |

*%SE represents the mean percent standard error of BP<sub>ND</sub> and Gamma values, as given by nonlinear least squares fittings of [<sup>123</sup>I]IBZM kinetics using the linear extension of the simplified reference region model, and it was used to assess parameter identifiability. Data are mean ± SD. Significantly different from RLA rats at \*\*\*p < 0.001.*
